# Supplementary material for: Clinical features which predict neuronal surface autoantibodies in new-onset focal epilepsy: implications for immunotherapies
Source: PubMed Central journal article supplement (PMC7892387; doi:10.1136/jnnp-2020-325011), 2020-11-20
Supplement: jnnp-2020-325011supp001.pdf [file jnnp-2020-325011supp001.pdf]

**Supplementary Table 1. Information captured by clinical phenotyping database**

|                                                                                                                            |
|----------------------------------------------------------------------------------------------------------------------------|
| <b><i>Clinical features</i></b>                                                                                            |
| Sex                                                                                                                        |
| Antibody status                                                                                                            |
| Date of birth                                                                                                              |
| Date of study recruitment                                                                                                  |
| Date of first seizure                                                                                                      |
| Epilepsy risk factors (neonatal, perinatal, focal neurological insults, family history of epilepsy or Alzheimer's disease) |
| Formal psychiatric disorder prior to epilepsy diagnosis                                                                    |
| Personal or family history of autoimmunity                                                                                 |
| Personal history of malignancy                                                                                             |
| History of status epilepticus                                                                                              |
| Self-reported neuropsychiatric changes (memory/psychosis/mood/anxiety)                                                     |
| Number of seizures in 2/6/12/24/36/48 months from onset                                                                    |
| Total number, type and duration of anti-seizure medications (ASMs) trialled                                                |
| Non-ASM medications including immunotherapy trials for seizure-control (date/type/route/course length/dose)                |
| Number of seizures in first 3/6/12/24/36/48 months after ASM commenced                                                     |
| Seizure-cessation reached (Yes/No)                                                                                         |
| Time to seizure-cessation from starting ASM (months)                                                                       |
| Adverse effect from ASM                                                                                                    |
|                                                                                                                            |
| <b><i>Investigations</i></b>                                                                                               |
| Serum sodium                                                                                                               |
| MRI result                                                                                                                 |
| EEG result                                                                                                                 |
|                                                                                                                            |
| <b><i>Clinical assessments/scores</i></b>                                                                                  |
| Hospital Anxiety and Depression Score (HADS)                                                                               |
| Addenbrooke's Cognitive Examination-Revised (ACE-R) score                                                                  |
| Quality of Life in Epilepsy-31 (QOLIE-31) score                                                                            |
| Antibody Prevalence in Epilepsy and Encephalopathy (APE2) score                                                            |
| Autoimmune encephalitis (clinical diagnosis and as defined by Graus et al <sup>11</sup> )                                  |

**Supplementary Table 2. Antibody Prevalence in Epilepsy and Encephalopathy Score**

**(APE2) criteria.** The maximum score is 18 points, and a total score of 4 or more has been considered suggestive for underlying autoantibodies.<sup>10</sup>

| <b>Criteria</b>                                                                    | <b>Points</b> |
|------------------------------------------------------------------------------------|---------------|
| New-onset, rapidly progressive mental status changes or new-onset seizure activity | <b>+1</b>     |
| Neuropsychiatric changes                                                           | <b>+1</b>     |
| Autonomic dysfunction                                                              | <b>+1</b>     |
| Viral prodrome                                                                     | <b>+2</b>     |
| Faciobrachial dystonic movements                                                   | <b>+3</b>     |
| Facial dyskinesias without faciobrachial dystonic movements                        | <b>+2</b>     |
| Seizures refractory to at least two anti-seizure medicines                         | <b>+2</b>     |
| CSF inflammation                                                                   | <b>+2</b>     |
| Brain MRI consistent with encephalitis                                             | <b>+2</b>     |
| Systemic malignancy within five years of neurological symptom onset                | <b>+2</b>     |

**Supplementary Table 3. Autoantibody detection.** Live cell-based assays (CBA) were used to detect NSAbs to leucine-rich glioma inactivated-1 (LGI1), contactin-associated protein-like 2 (CASPR2), contactin-2, dipeptidyl-peptidase-like protein 6 (DPPX), N-methyl-D-aspartate receptor (NMDA-R),  $\alpha$ -amino-3-hydroxy-5-methyl-4-isoxazole propionic acid receptor (AMPA-R),  $\gamma$ -aminobutyric acid A receptor (GABA<sub>A</sub>R),  $\gamma$ -aminobutyric acid B receptor (GABA<sub>B</sub>R) and the glycine receptor. A radioimmunoprecipitation assay (RIPA) was used to detect antibodies to glutamic acid decarboxylase-65 (GAD65). Live neuronal-based assays (NBA) tested for antibody binding to neuronal surface antigens.

| Target antigen                                                    | Assay method |
|-------------------------------------------------------------------|--------------|
| GAD65                                                             | RIPA         |
| LGI1                                                              | Live CBA     |
| CASPR2                                                            | Live CBA     |
| Contactin-2                                                       | Live CBA     |
| AMPA-R                                                            | Live CBA     |
| GABA <sub>A</sub> R                                               | Live CBA     |
| GABA <sub>B</sub> R                                               | Live CBA     |
| Glycine receptor                                                  | Live CBA     |
| NMDA-R                                                            | Live CBA     |
| Hippocampal neuron surface binding without the above reactivities | Live NBA     |

**Supplementary Table 4. Patients excluded from study**

| <b>Reason for exclusion</b>          | <b>Number of patients</b> |
|--------------------------------------|---------------------------|
| <18 years                            | 1                         |
| Duplicate registration               | 1                         |
| Generalised epilepsy                 | 3                         |
| Epilepsy diagnosis >12months         | 5                         |
| Focal epilepsy diagnosis unconfirmed | 9                         |
| Clinical information unavailable     | 1                         |
| No serum samples received            | 2                         |
